# Supplementary material for: Engineering ultrasound-activated piezoelectric hydrogels with antibacterial activity to promote wound healing
Source: Royal Society of Chemistry journal article supplement (doi:10.1039/d3tb00284e), 2023-01-01
Supplement: d3tb00284e1.pdf [file d3tb00284e1.pdf]

## Supporting Information

### **Engineering ultrasound-activated piezoelectric hydrogels with antibacterial activity to promote wound healing**

Min Xu,<sup>a</sup> Shaozhen Wu,<sup>e</sup> Li Ding,<sup>e</sup> Caijiao Lu,<sup>b</sup> Huangjing Qian,<sup>a</sup> Jinmiao Qu,<sup>\*,c</sup> Yu Chen <sup>\*,d,e</sup>

<sup>a</sup> Department of Operating Room, The First Affiliated Hospital of Wenzhou Medical University, Wenzhou, 325000, P. R. China.

<sup>b</sup> Department of Wound Healing, The First Affiliated Hospital of Wenzhou Medical University, Wenzhou, 325000, P. R. China.

<sup>c</sup> Department of Thyroid Cancer, The First Affiliated Hospital of Wenzhou Medical University, Wenzhou, 325000, P. R. China. E-mail: qujinmiao@126.com

<sup>d</sup> Materdicine Lab, School of Life Science, Shanghai University, Shanghai, 200444, P. R. China. E-mail: chenyu@shu.edu.cn.

<sup>e</sup> Wenzhou Institute of Shanghai University, Wenzhou, 325000, P. R. China.

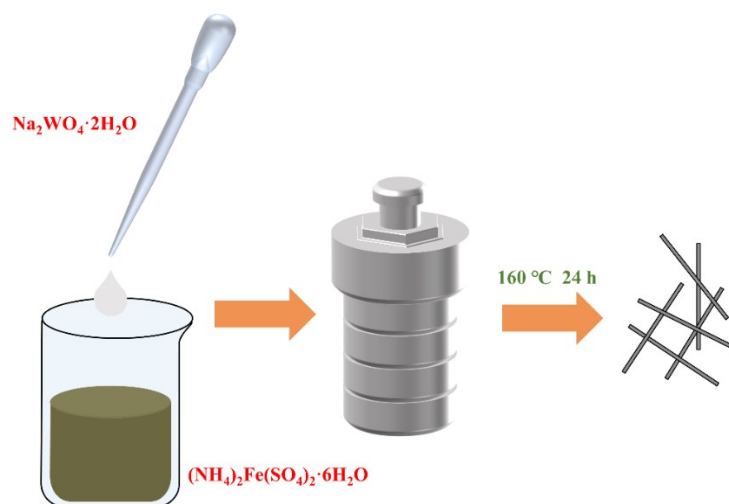

**Fig. S1.** Schematic illustration of preparation of  $\text{FeWO}_4$  nanorods.

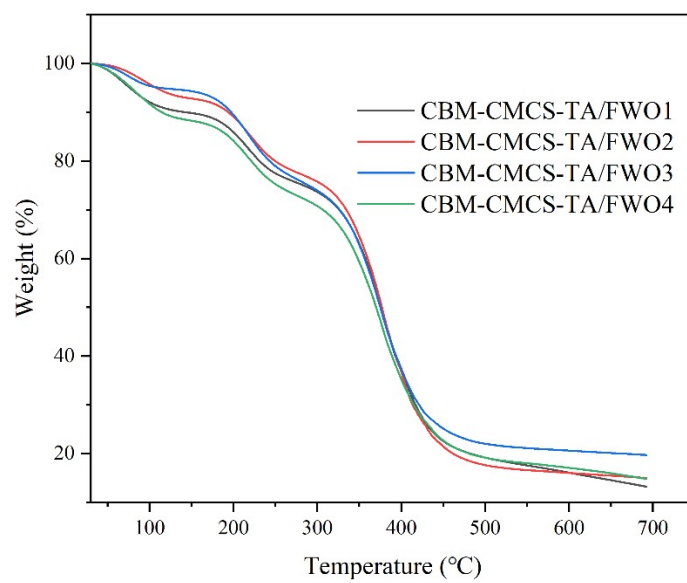

**Fig. S2.** TGA of different hydrogels.

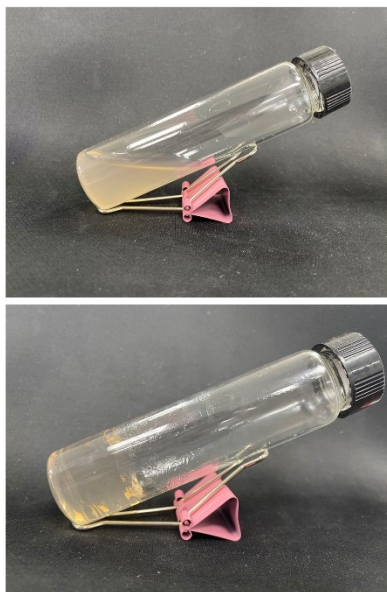

**Fig. S3.** Photographs of the Formation of the hydrogel.

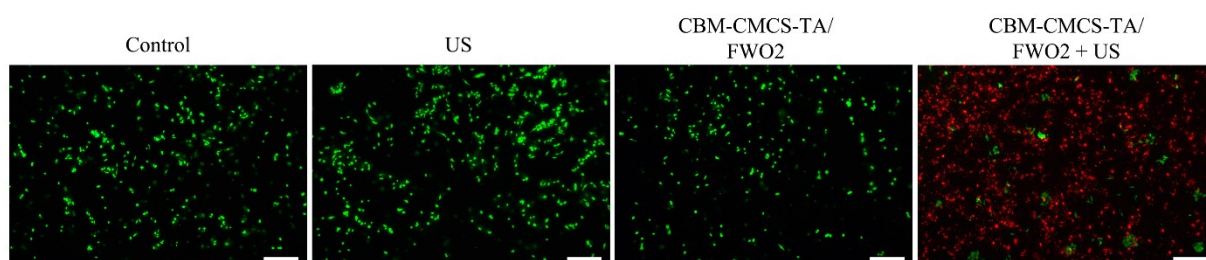

**Fig. S4.** Fluorescent micrographs of in vitro antibacterial performance of hydrogels with live/dead staining after the bacteria continued to grow for 4 h after various treatments. Green, live bacteria; red, dead bacteria. Scale bar: 10  $\mu\text{m}$ .

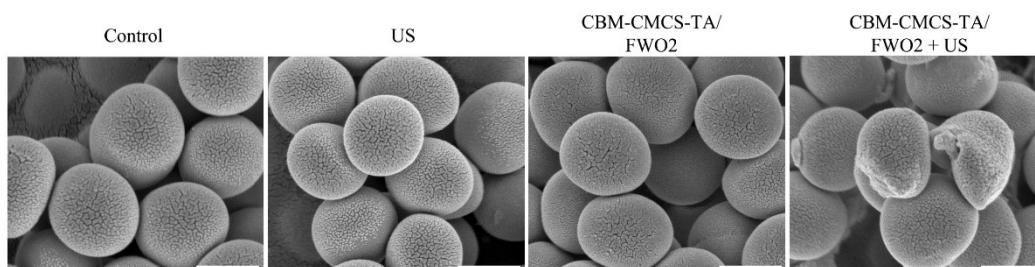

**Fig. S5.** SEM images of in vitro antibacterial performance of hydrogels with scanning electron microscope after the bacteria continued to grow for 4 h after various treatments. Scale bar: 500 nm.

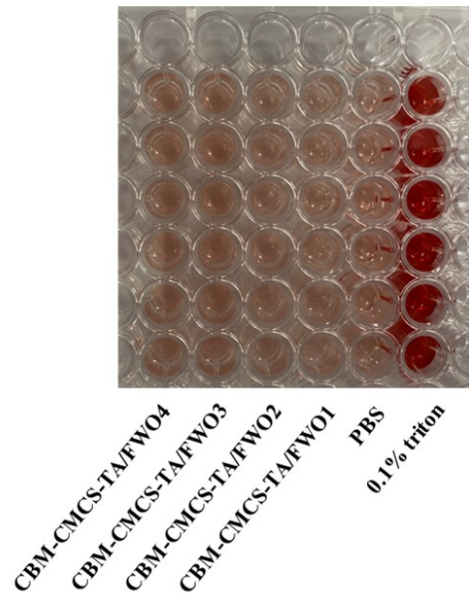

**Fig. S6.** Photographs from hemolytic activity test of the hydrogels.

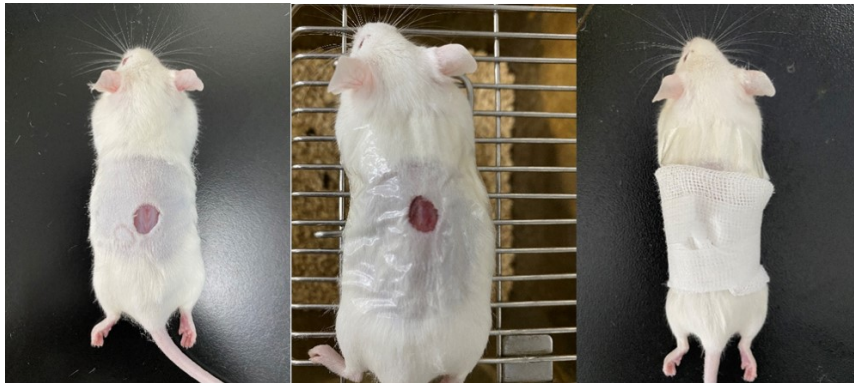

**Fig. S7.** Photographs of animal experiment.
